# Supplementary material
Source: PubMed Central journal article supplement (PMC4209173)
Supplement: NIHMS58675-supplement-01.pdf [file NIHMS58675-supplement-01.pdf]

# Pharmacogenetics of warfarin in a paediatric population: initial dosing and adverse effects (Online Supplementary Data)

---

*Dr Daniel B Hawcutt<sup>1, 2</sup>, Dr Laura Sutton<sup>3</sup>, Dr Andrea Jorgenesen<sup>3</sup>, Azizah Ab Ghani<sup>1</sup>, Mary Murray<sup>4</sup>, Dr Helen Michael<sup>4</sup>, Dr Ian Peart<sup>4</sup>, Professor Rosalind Smyth<sup>1</sup>, Professor Munir Pirmohamed<sup>1</sup>*

## Affiliations:

- 1:** Institute of Translational Medicine, University of Liverpool
- 2:** Department of Research, Alder Hey Children's NHS Foundation Trust, Liverpool
- 3:** Department of Biostatistics, University of Liverpool
- 4:** Department of Cardiology, Alder Hey Children's NHS Foundation Trust, Liverpool

## Methods

### DNA collection and extraction

Patients provided salivary samples for DNA. DNA was captured, stabilised and purified using the Oragene.DNA kit<sup>42</sup>. Following collection of the sample, and mixing with the Oragene DNA preserving solution, samples were stored at -80°C. Following defrosting, samples were incubated (50°C, 1 hour), and then Oragene DNA Purifier added (1:25), followed by incubation (ice, 10 minutes). The mixture then was centrifuged (4600rpm, 10 minutes). The supernatant resulting was mixed with an equal volume of 95% ethanol, centrifuged (4600rpm, 10 minutes). The resulting DNA pellet was rinsed with 1ml 70% ethanol, and rehydrated (addition of TE buffer, cold room storage). Assessment of rehydration was made at 7 days, if incomplete, additional cold storage (7 days) undertaken.

Quantification was undertaken using Nanodrop.

## Genotyping

The SNPs CYP2C9\*2 (rs 1799853), CYP2C9\*3 (rs 1057910) and VKORC1 (rs 9923231) were selected for genotyping, as these have been shown to affect dosing requirement in adult populations using warfarin<sup>8-10</sup>.

The genotyping of CYP2C9\*2, CYP2C9\*3 and rs9923231 was performed on ABI 7900HT Real time PCR using Taqman chemistry. PCR was carried out using Taqman Drug metabolism Genotyping Assays C-30403261\_20, C-25625805\_10 and C-30403261\_20. A reaction volume of 10µl contained 10ng DNA, 1xTaqman master mix and 1 x Taqman drug metabolising genotyping assay mix. In order to minimise cross contamination of samples, a dry-down DNA method was performed according to manufacturer's protocol. The PCR condition were as follows: Activation of AmpliTaq Gold DNA polymerase at 95°C for 10 min, followed by 40 cycles of denaturing at 95°C for 15 sec and extension at 60°C for 90 sec. Alleles were clustered using fluorescent signals (VIC and FAM). Each PCR plate was contained 10% duplicates, two negative controls and one heterozygous control for each SNP and samples with a discrepant call were repeated under the same conditions. Self-priming of negative control(s) was considered to be contamination, and genotyping repeated. Genotype personnel were blinded to outcome data.

**Supplementary table 1**

| <b>Target (range) of international normalized ratio (INR)</b> | <b>Clinical Indication</b>                                                                                                                                                                                                                                                                          |
|---------------------------------------------------------------|-----------------------------------------------------------------------------------------------------------------------------------------------------------------------------------------------------------------------------------------------------------------------------------------------------|
| 2.0 (1.5-2.5)                                                 | Haemodialysis                                                                                                                                                                                                                                                                                       |
| 2.5 (2.0-3.0)                                                 | Fontan's Circulation, Cavopulmonary anastomosis, Central Venous line thrombosis, Pulmonary embolus, Proximal DVT, Calf Vein Thrombosis, Recurrence of Venous Thromboembolism, Non-rheumatic Atrial Fibrillation, Mural Thrombus, Cardiomyopathy, Cardioversion, Symptomatic Inherited Thrombophilia |
| 3.5 (3.0-4.0)                                                 | Recurrence of venous thromboembolism whilst on Warfarin therapy, Mechanical Prosthetic Valve, Unfenestrated Fontan Circulation                                                                                                                                                                      |

Targets and Ranges of INR for various clinical conditions used at Alder Hey Children's Hospital (adapted from "Guidelines for oral anticoagulation" [4])

**Supplementary data table 2**

|                          | N    | Mean | Std. Deviation |
|--------------------------|------|------|----------------|
| Age                      | 12   | 7.2  | 7.1            |
| Height (cm)              | 11   | 1.2  | 0.412          |
| Weight (kg)              | 12   | 30.1 | 29.6           |
| Albumin (g/dl)           | 10   | 33.7 | 4.8            |
| BMI (kg/m <sup>2</sup> ) | 11   | 18.9 | 5.7            |
| Male gender              | 7/12 | -    | -              |

Characteristics of the 12 patients who did not achieve stable dose (at the start of therapy).

**Supplementary table 3**

|                    | <b>VKORC1 Wild Type</b> | <b>VKORC1 -1639<br/>Heterozygote</b> | <b>VKORC1 -1639<br/>Homozygote</b> |
|--------------------|-------------------------|--------------------------------------|------------------------------------|
| <b>CYP2C9*1/*1</b> | 23                      | 32                                   | 6                                  |
| <b>CYP2C9*1/*2</b> | 5                       | 6                                    | 5                                  |
| <b>CYP2C9*2/*2</b> | 2                       | 0                                    | 0                                  |
| <b>CYP2C9*1/*3</b> | 9                       | 5                                    | 1                                  |
| <b>CYP2C9*2/*3</b> | 1                       | 2                                    | 0                                  |

The combination of genotypes found in the cohort of children recruited

## Supplementary Table 4

Individual SNP association analyses

| Outcome                                 | SNP (assumption)              | p-value from LRT   | Significant following FDR adjustment |
|-----------------------------------------|-------------------------------|--------------------|--------------------------------------|
| Proportion of time in INR range (PTIR)* | <i>CYP2C9</i> *2 (none)       | 0.58,0.030         | No                                   |
|                                         | <i>CYP2C9</i> *2 (additive)   | 0.53               | No                                   |
|                                         | <i>CYP2C9</i> *3 (NA†)        | 0.95               | No                                   |
|                                         | <i>VKORC1-1693</i> (none)     | 0.03, 0.014        | No                                   |
|                                         | <i>VKORC1-1693</i> (additive) | <b>0.001</b>       | <b>Yes</b>                           |
| INR above range in week 1               | <i>CYP2C9</i> *2 (none)       | 0.040,0.988        | No                                   |
|                                         | <i>CYP2C9</i> *2 (additive)   | <b>0.004,</b>      | <b>Yes</b>                           |
|                                         | <i>CYP2C9</i> *3 (NA†)        | 0.800              | No                                   |
|                                         | <i>VKORC1-1693</i> (none)     | 0.23, 0.031        | No                                   |
|                                         | <i>VKORC1-1693</i> (additive) | 0.020              | No                                   |
| Stable dose**                           | <i>CYP2C9</i> *2 (none)       | 0.089, 0.802       | No                                   |
|                                         | <i>CYP2C9</i> *2 (additive)   | <b>0.008</b>       | <b>Yes</b>                           |
|                                         | <i>CYP2C9</i> *3 (NA†)        | 0.049              | No                                   |
|                                         | <i>VKORC1-1693</i> (none)     | 0.35, 0.03         | No                                   |
|                                         | <i>VKORC1-1693</i> (additive) | <b>0.003</b>       | <b>Yes</b>                           |
| Haemorrhagic complications              | <i>CYP2C9</i> *2 (none)       | 0.819, 0.989       | No                                   |
|                                         | <i>CYP2C9</i> *2 (additive)   | 0.423              | No                                   |
|                                         | <i>CYP2C9</i> *3 (NA†)        | 0.482              | No                                   |
|                                         | <i>VKORC1-1693</i> *2 (none)  | <b>0.006, 0.87</b> | <b>Yes</b>                           |
|                                         | <i>VKORC1-1693</i> (Additive) | 0.288              | No                                   |

Individual SNP association analyses. FDR = false discovery rate; LRT = likelihood ratio test.

\* Analyses adjusted for indication for treatment and target INR group

\*\* Analyses adjusted for age and target INR group

† No mutant homozygotes so assumption regarding mode of inheritance irrelevant

Supplementary Data Table 5

| Outcome                         | Assumed mode of inheritance  | Predictor variables      | Coefficient (95% CI)         |
|---------------------------------|------------------------------|--------------------------|------------------------------|
| Proportion of time in INR range | None                         | CYP2C9*2 (1)             | 0.02 (-0.12, 0.15)           |
|                                 |                              | (2)                      | -0.36 (-0.74, 0.02)          |
|                                 |                              | VKORC1*2 (1)             | 0.11 (-0.00, 0.23)           |
|                                 |                              | (2)                      | <b>0.20 (0.02, 0.39)*</b>    |
|                                 | Additive                     | Indication for treatment | 0.09 (-0.03, 0.20)           |
|                                 |                              | VKORC1*2                 | <b>0.11 (0.04, 0.19)*</b>    |
|                                 |                              | Indication for treatment | 0.11 (-0.01, 0.22)           |
|                                 |                              | Stable dose              | None                         |
| (2)                             | <b>-1.33 (-2.55, -0.11)*</b> |                          |                              |
| Height                          | <b>2.10 (0.38, 3.82)*</b>    |                          |                              |
| Target INR (1.5-2.5)            | 0.76 (-0.71, 2.22)           |                          |                              |
| (2.0-3.0)                       | 0.56 (-0.93, 2.05)           |                          |                              |
| (3.0-4.0)                       | -0.91 (-3.28, 1.47)          |                          |                              |
| Indication for treatment (1)    | -0.25 (-1.50, 1.00)          |                          |                              |
| (2)                             | -0.61 (-2.19, 0.96)          |                          |                              |
| Additive                        | VKORC1*2                     |                          | <b>-0.60 (-1.17, -0.03)*</b> |
|                                 | Height                       |                          | <b>2.08 (0.37, 3.78)*</b>    |
|                                 | Target INR (1.5-2.5)         |                          | 0.77 (-0.70, 2.23)           |
|                                 | (2.0-3.0)                    |                          | 0.51 (-0.96, 1.99)           |
|                                 | (3.0-4.0)                    |                          | -0.93 (-3.30, 1.44)          |
|                                 | Indication for treatment (1) |                          | -0.25 (-1.50, 0.99)          |
| (2)                             | -0.64 (-2.21, 0.92)          |                          |                              |

Multiple SNP regression models (continuous variables) \* $p < 0.05$

(1) Heterozygote for allele (2) Homozygote for allele

**Supplementary Data Table 6**

| <b>Outcome</b>             | <b>Assumed mode of inheritance</b> | <b>Predictor variables</b> | <b>Odds ratio (95% CI)</b> |
|----------------------------|------------------------------------|----------------------------|----------------------------|
| INR above range in week 1  | None                               | CYP2C9*2 (1)               | 2.83 (0.91, 8.85)          |
|                            |                                    | (2)                        | -                          |
|                            |                                    | VKORC1*2 (1)               | 2.12 (0.82, 5.49)          |
|                            |                                    | (2)                        | <b>7.25 (1.25, 41.98)*</b> |
|                            | Additive                           | CYP2C9*2                   | <b>3.59 (1.32, 9.78)*</b>  |
|                            |                                    | VKORC1*2                   | <b>2.38 (1.16, 4.92)*</b>  |
| Haemorrhagic complications | None                               | VKORC1*2 (1)               | <b>3.50 (1.31, 9.32)*</b>  |
|                            |                                    | (2)                        | 0.88 (0.16, 4.90)          |
|                            | Additive                           | NA                         | NA                         |

Multiple SNP logistic regression models (binary variables) \* $p < 0.05$ . (1) Heterozygote for allele (2) Homozygote for allele



**Supplementary Table 7**

| Outcome                              | Variables included         | Coefficient (95% CI)*      | Adjusted/pseudo R <sup>2</sup> |                   |               |
|--------------------------------------|----------------------------|----------------------------|--------------------------------|-------------------|---------------|
|                                      |                            |                            | Non-genetic variables          | Genetic variables | All variables |
| PTIR                                 | Indication for treatment   | 0.09 (-0.04, 0.22)         |                                |                   |               |
|                                      | INR group                  | 1: -0.33 (-0.54, -0.12)    | 11.3%                          | 9.5%              | 20.8%         |
|                                      |                            | 2: -0.00 (-0.17, 0.17)     |                                |                   |               |
|                                      |                            | 3: 0.20 (-0.08, 0.49)      |                                |                   |               |
| <i>VKORC1-1693</i> (additive)        | 0.13 (0.05, 0.21)          |                            |                                |                   |               |
| INR exceeding target range in week 1 | <i>CYP2C9*2</i> (additive) | 4.18 (1.42, 12.34)         | -                              | 6.8%              | 6.8%          |
| Stable dose                          | Age                        | 0.19 (0.12, 0.25)          |                                |                   |               |
|                                      | INR group                  | 1: -1.05 (-2.36, 0.26)     | 29.2%                          | 11.9%             | 41.4%         |
|                                      |                            | 2: 0.93 (0.14, 1.73)       |                                |                   |               |
|                                      |                            | 3: -0.27 (-2.81, 2.27)     |                                |                   |               |
|                                      | <i>CYP2C9*2</i> (additive) | -0.82 (-1.39, -0.25)       |                                |                   |               |
| <i>VKORC1-1693</i> (additive)        | -0.66 (-1.08, -0.25)       |                            |                                |                   |               |
| Haemorrhagic complications           | <i>VKORC1-1693</i> (none)  | Hetero: 4.53 (1.59, 12.93) | -                              | 8.7%              | 8.7%          |
|                                      |                            | Homo: 1.13 (0.20, 6.51)    |                                |                   |               |

Final multiple regression models

\*Regression coefficient for multiple regression models; odds ratio for logistic regression models; CI = confidence interval. PTIR = Proportion of time spent in target INR range.
